# Supplementary material for: Health system impacts of SARS-CoV − 2 variants of concern: a rapid review
Source: BMC Health Serv Res. 2022 Apr 23;22:544. doi: 10.1186/s12913-022-07847-0 (PMC9034743; doi:10.1186/s12913-022-07847-0)
Supplement: Supplementary file 1 — Additional file 1. [file 12913_2022_7847_MOESM1_ESM.pdf]

## Supplementary Material 1: Literature Search Strategy

### MEDLINE All (OVID)

COVID-19 search filter: CADTH <https://covid.cadth.ca/literature-searching-tools/cadth-covid-19-search-strings/>

|    |                                                                                                                                                                                                                                                                                                                         |
|----|-------------------------------------------------------------------------------------------------------------------------------------------------------------------------------------------------------------------------------------------------------------------------------------------------------------------------|
| 1  | (coronavirus/ or betacoronavirus/ or coronavirus infections/) and (disease outbreaks/ or epidemics/ or pandemics/)                                                                                                                                                                                                      |
| 2  | (ncov* or 2019ncov or 19ncov or covid19* or covid or sars-cov-2 or sarscov-2 or sarscov2 or severe acute respiratory syndrome coronavirus 2 or severe acute respiratory syndrome corona virus 2).ti,ab,kf,nm,ot,ox,rx,px.                                                                                               |
| 3  | ((new or novel or "19" or "2019" or wuhan or hubei or china or chinese) adj3 (coronavirus* or corona virus* or betacoronavirus* or CoV or HCoV)).ti,ab,kf,ot.                                                                                                                                                           |
| 4  | ((coronavirus* or corona virus* or betacoronavirus*) adj3 (pandemic* or epidemic* or outbreak* or crisis)).ti,ab,kf,ot.                                                                                                                                                                                                 |
| 5  | ((wuhan or hubei) adj5 pneumonia).ti,ab,kf,ot.                                                                                                                                                                                                                                                                          |
| 6  | or/1-5 [CADTH COVID-19 filter, no date limit]                                                                                                                                                                                                                                                                           |
| 7  | ((uk or united kingdom or england or english or britain or british or kent) adj3 (variant* or voc or vui)) or "b117" or "20i 501yv1" or "variant of concern 202012 01" or "voc 202012 01" or "variant under investigation in december 2020" or "variant under investigation 202012 01" or "vui 202012 01").ti,ab,kw,kf. |
| 8  | ((south africa* or sa) adj3 (variant* or voc or vui)) or "b1351" or "501v2" or "501yv2" or "20h 501yv2" or "20c 501yv2").ti,ab,kw,kf.                                                                                                                                                                                   |
| 9  | ((brazil* adj3 (variant* or voc or vui)) or "p1" or "b11281" or ((mutation* or spike*) adj3 (k417t or e484k or n501y))).ti,ab,kw,kf.                                                                                                                                                                                    |
| 10 | ((mutation* or spike*) adj3 d614g).ti,ab,kw,kf.                                                                                                                                                                                                                                                                         |
| 11 | ((india* adj3 (variant* or voc or vui)) or "b1617*" or "g 452v3" or "voc 21apr" or "vui 21apr" or double mutation or double mutant or double variant or triple mutation or triple mutant or triple variant or ((mutation* or spike*) adj3 (e484q or l452r or p681r))).ti,ab,kw,kf.                                      |
| 12 | ((alpha or beta or gamma or delta) adj3 variant*).ti,ab,kw,kf.                                                                                                                                                                                                                                                          |
| 13 | or/7-12                                                                                                                                                                                                                                                                                                                 |
| 14 | 6 and 13                                                                                                                                                                                                                                                                                                                |
|    | 1407 results 2021-09-27                                                                                                                                                                                                                                                                                                 |

### Embase (Elsevier Embase.com)

COVID-19 search filter: CADTH adapted to Embase.com format; line 1 exploded

|   |                                                                                                                 |
|---|-----------------------------------------------------------------------------------------------------------------|
| 1 | 'SARS-related coronavirus'/exp                                                                                  |
| 2 | ('coronavirinae'/de OR 'betacoronavirus'/de OR 'coronavirus infection'/de) AND ('epidemic'/de OR 'pandemic'/de) |

|    |                                                                                                                                                                                                                                                                                                                                     |
|----|-------------------------------------------------------------------------------------------------------------------------------------------------------------------------------------------------------------------------------------------------------------------------------------------------------------------------------------|
| 3  | (ncov* OR 2019ncov OR 19ncov OR covid19* OR covid OR 'sars-cov-2' OR 'sarscov-2' OR 'sars-cov2' OR sarscov2 OR 'severe acute respiratory syndrome coronavirus 2' OR 'severe acute respiratory syndrome corona virus 2'):ti,ab,kw,de,tt,oa,ok                                                                                        |
| 4  | ((new OR novel OR '19' OR '2019' OR wuhan OR hubei OR china OR chinese) NEAR/3 (coronavirus* OR 'corona virus*' OR betacoronavirus* OR cov OR hcov)):ti,ab,kw,de,tt,oa,ok                                                                                                                                                           |
| 5  | ((coronavirus* OR 'corona virus*' OR betacoronavirus*) NEAR/3 (pandemic* OR epidemic* OR outbreak* OR crisis)):ti,ab,kw,tt,oa,ok                                                                                                                                                                                                    |
| 6  | ((wuhan OR hubei) NEAR/5 pneumonia):ti,ab,kw,tt,oa,ok                                                                                                                                                                                                                                                                               |
| 7  | #1 OR #2 OR #3 OR #4 OR #5 OR #6                                                                                                                                                                                                                                                                                                    |
| 8  | ((uk OR 'united kingdom' OR england OR english OR britain OR british OR kent) NEAR/3 (variant* OR voc OR vui)) OR 'b.1.1.7' OR b117 OR '20i 501y.v1' OR 'variant of concern 202012 01' OR 'voc 202012 01' OR 'variant under investigation in december 2020' OR 'variant under investigation 202012 01' OR 'vui 202012 01'):ti,ab,kw |
| 9  | ((('south africa*' OR sa) NEAR/3 (variant* OR voc OR vui)) OR 'b.1.351' OR b1351 OR '501.v2' OR '501y.v2' OR '20h 501y.v2' OR '20c 501y.v2'):ti,ab,kw                                                                                                                                                                               |
| 10 | ((brazil* NEAR/3 (variant* OR voc OR vui)) OR 'p.1' OR p1 OR 'b.1.1.28.1' OR b11281 OR ((mutation* OR spike*) NEAR/3 (k417t OR e484k OR n501y))):ti,ab,kw                                                                                                                                                                           |
| 11 | ((mutation* OR spike*) NEAR/3 d614g):ti,ab,kw                                                                                                                                                                                                                                                                                       |
| 12 | ((india* NEAR/3 (variant* OR voc OR vui)) OR 'b.1.617*' OR b1617* OR 'g 452.v3' OR 'voc 21apr' OR 'vui 21apr' OR 'double mutation' OR 'double mutant' OR 'double variant' OR 'triple mutation' OR 'triple mutant' OR 'triple variant' OR ((mutation* OR spike*) NEAR/3 (e484q OR l452r OR p681r))):ti,ab,kw                         |
| 13 | ((alpha OR beta OR gamma OR delta) NEAR/3 variant*):ti,ab,kw                                                                                                                                                                                                                                                                        |
| 14 | #8 OR #9 OR #10 OR #11 OR #12 OR #13                                                                                                                                                                                                                                                                                                |
| 15 | #7 AND #14                                                                                                                                                                                                                                                                                                                          |
|    | 1297 results 2021-09-27                                                                                                                                                                                                                                                                                                             |

# Cochrane Library (Wiley)

|   |                                                          |
|---|----------------------------------------------------------|
| 1 | MeSH descriptor: [Coronavirus] this term only            |
| 2 | MeSH descriptor: [Betacoronavirus] this term only        |
| 3 | MeSH descriptor: [Coronavirus Infections] this term only |
| 4 | {or #1-#3}                                               |
| 5 | MeSH descriptor: [Disease Outbreaks] this term only      |
| 6 | MeSH descriptor: [Epidemics] this term only              |
| 7 | MeSH descriptor: [Pandemics] this term only              |
| 8 | {or #5-#7}                                               |
| 9 | #4 and #8                                                |

|    |                                                                                                                                                                                                                   |
|----|-------------------------------------------------------------------------------------------------------------------------------------------------------------------------------------------------------------------|
| 10 | (ncov* or 2019ncov or 19ncov or covid19* or covid or "sars-cov-2" or "sarscov-2" or sarscov2 or "severe acute respiratory syndrome coronavirus 2" or "severe acute respiratory syndrome corona virus 2"):ti,ab,kw |
| 11 | ((new or novel or "19" or "2019" or wuhan or hubei or china or chinese) near/3 (coronavirus* or "corona virus*" or betacoronavirus* or cov or hcov)):ti,ab,kw                                                     |
| 12 | ((coronavirus* or "corona virus*" or betacoronavirus*) near/3 (pandemic* or epidemic* or outbreak* or crisis)):ti,ab,kw                                                                                           |
| 13 | ((wuhan or hubei) near/5 pneumonia):ti,ab,kw                                                                                                                                                                      |
| 14 | {or #9-#13}                                                                                                                                                                                                       |
| 15 | (variant* or voc or vui or mutation* or spike):ti,ab                                                                                                                                                              |
| 16 | #14 and #15                                                                                                                                                                                                       |
|    | <b>211 results in CENTRAL 2021-09-27</b><br><b>3 results in CDSR 2021-09-27</b>                                                                                                                                   |

## Epistemonikos LOVE on COVID-19

Basic search of the following terms within the LOVE:

variant\* OR voc OR vui OR "ALPHA" OR "20I/501Y.V1" OR "202012/01" OR "B.1.351" OR "501.V2" OR "501Y.V2" OR "20H/501Y.V2" OR "20C/501Y.V2" OR "P.1" OR "B.1.1.28.1" OR "K417T" OR "E484K" OR "N501Y" OR "D614G" OR "B.1.617" OR "B.1.617.1" OR "B.1.617.2" OR "B.1.617.3" OR "G/452.V3" OR "VOC-21APR" OR "VUI-21APR" OR "double mutation" OR "double mutant" OR "double variant" OR "E484Q" OR "L452R" OR "P681R"

**3494 results 2021-09-27**

## medRxiv / bioRxiv

medRxiv and bioRxiv simultaneous search; Title and Abstract search; All words (unless otherwise specified); 50 per page; Best Match; first 50 results of each search query exported; internal duplicates removed using Covidence

Original search (limited October 1, 2020 – May 11, 2021) - 423 results through May 11, 2021

uk variant  
united kingdom variant  
england variant  
english variant  
britain variant  
british variant  
kent variant  
south africa variant  
brazil variant  
variant of concern (*phrase search*)  
variants of concern (*phrase search*)  
ALPHA  
20I/501Y.V1  
202012/01

|                                          |    |
|------------------------------------------|----|
| B.1.351                                  | 36 |
| 501.V2                                   | 37 |
| 501Y.V2                                  | 38 |
| 20H/501Y.V2                              | 39 |
| 20C/501Y.V2                              | 40 |
| P.1                                      | 41 |
| B.1.1.28.1                               | 42 |
| K417T                                    | 43 |
| E484K                                    | 44 |
| N501Y                                    | 45 |
| D614G                                    | 46 |
| india variant                            | 47 |
| B.1.617                                  | 48 |
| B.1.617.1                                | 49 |
| B.1.617.2                                | 50 |
| B.1.617.3                                | 51 |
| G/452.V3                                 | 52 |
| VOC-21APR                                | 53 |
| VUI-21APR                                | 54 |
| double mutation ( <i>phrase search</i> ) | 55 |
| double mutant ( <i>phrase search</i> )   | 56 |
| double variant ( <i>phrase search</i> )  | 57 |
| E484Q                                    | 58 |
| L452R                                    |    |
| P681R                                    |    |

59

60

61 Updated search (May 11, 2021 – September 27, 2021) - 465 results through September 27, 2021

alpha variant  
beta variant  
gamma variant  
delta variant  
uk variant  
united kingdom variant  
england variant  
english variant  
britain variant  
british variant  
kent variant  
south africa variant  
brazil variant  
india variant  
variant of concern (*phrase search*)  
variants of concern (*phrase search*)

*Search for any (all at once):*

*Group 1*

B.1.1.7

20I/501Y.V1  
202012/01  
B.1.351  
501.V2  
501Y.V2  
20H/501Y.V2  
20C/501Y.V2  
P.1  
B.1.1.28.1  
K417T  
E484K  
N501Y  
D614G

*Group 2*

B.1.617  
B.1.617.1  
B.1.617.2  
B.1.617.3  
G/452.V3  
VOC-21APR  
VUI-21APR  
E484Q  
L452R  
P681R

62

63

64

65

66 **Supplementary Material 2: Summary Tables of Included Studies**

| Author, date          | Date of data collection     | Source                                            | Objective                                                                                                                                                                                                | Setting                | Sample size                                        | Outcome measures                                               | Variant      | Country | Main finding                                                                                                                                                                                                                                                                                                                                                                                                             |
|-----------------------|-----------------------------|---------------------------------------------------|----------------------------------------------------------------------------------------------------------------------------------------------------------------------------------------------------------|------------------------|----------------------------------------------------|----------------------------------------------------------------|--------------|---------|--------------------------------------------------------------------------------------------------------------------------------------------------------------------------------------------------------------------------------------------------------------------------------------------------------------------------------------------------------------------------------------------------------------------------|
| Abu-Raddad, 2021 [74] | Jan 18-May 31, 2021         | Clinical Infectious Diseases                      | To conduct a comparative assessment of the severity, criticality, and fatality of Alpha & Beta                                                                                                           | Community and hospital | NR                                                 | Acute-care hospitalization, ICU hospitalization, and mortality | Alpha, Beta  | Qatar   | Compared to Alpha variant, odds of progressing to severe disease were 1.24-fold (95% CI: 1.11-1.39) higher for Beta, odds of progressing to critical disease were 1.49-fold (95% CI: 1.13-1.97) higher, and odds of COVID-19 death were 1.57-fold (95% CI: 1.03-2.43) higher. The relationship between cases and deaths, even when controlling for age, is not static through the second wave of coronavirus in England. |
| Ackland, 2021 [79]    | Apr 22 <sup>nd</sup> , 2021 | medRxiv                                           | To track the statistical CFR in the second wave of the UK outbreak, and to understand its variations over time.                                                                                          | Community              | NR                                                 | Estimates of CFR and their variations over time                | Alpha        | UK      | The rapid growth in CFR in December can be understood in part in terms of a more deadly new variant Alpha, while a decline in January correlates with vaccine roll-out.                                                                                                                                                                                                                                                  |
| Adhikari, 2021 [44]   | May 17, 2020 - Sept 4, 2021 | American Journal of Obstetrics & Gynecology       | To report the trends of illness severity among obstetrical patients with COVID-19, on a background of Delta variant predominance and describe COVID-19 vaccinations in this cohort at Parkland Hospital. | Hospital               | 1515 pregnant patients diagnosed with COVID-19     | Severe or critical COVID-19 illness in pregnancy               | Delta        | USA     | Increased morbidity was observed in pregnancy with COVID-19 during the recent surge associated with the Delta variant, particularly where vaccine acceptance is low.                                                                                                                                                                                                                                                     |
| Agrawal, 2021 [39]    | Dec 15, 2020-June 15, 2021  | European Journal of Molecular & Clinical Medicine | To analyze and establish a correlation of demographic features and vaccination status                                                                                                                    | Hospital               | 478 sequenced samples among which 100 samples were | Mortality                                                      | Alpha, Delta | India   | Vaccination has an important protective role in decreasing mortality, especially against the Delta variant for old age                                                                                                                                                                                                                                                                                                   |

| Author, date         | Date of data collection       | Source                                                            | Objective                                                                                                                                                                                                                                                                                                                                                                                                                                                    | Setting              | Sample size                                                        | Outcome measures                                                                                                   | Variant | Country | Main finding                                                                                                                                                                                                                                                                                                                                                                                                                        |
|----------------------|-------------------------------|-------------------------------------------------------------------|--------------------------------------------------------------------------------------------------------------------------------------------------------------------------------------------------------------------------------------------------------------------------------------------------------------------------------------------------------------------------------------------------------------------------------------------------------------|----------------------|--------------------------------------------------------------------|--------------------------------------------------------------------------------------------------------------------|---------|---------|-------------------------------------------------------------------------------------------------------------------------------------------------------------------------------------------------------------------------------------------------------------------------------------------------------------------------------------------------------------------------------------------------------------------------------------|
| AlQahtani, 2021 [50] | Dec 9, 2020 - July 17, 2021   | Research Square                                                   | <p>with clinical outcome of VOC's.</p> <p>To present an analysis of COVID-19 related outcomes from Bahrain, where four vaccines were deployed, and provide a granular description of the effectiveness of the four vaccines, disease burden in unvaccinated versus vaccinated individuals over time, and the risk of four outcomes (infections, hospitalizations, ICU admissions and deaths) due to breakthrough infections among vaccinated individuals</p> | Community            | 1,003,960                                                          | Histories of vaccinated vs. unvaccinated cases in terms of infections, hospitalizations, ICU admissions and deaths | Delta   | Bahrain | <p>patients with associated co-morbidities.</p> <p>All four vaccines decreased the risk of SARS-CoV-2 infections, hospitalizations, ICU admissions and deaths among vaccine recipients when compared to unvaccinated individuals. However, individuals who received the Sinopharm experienced a higher rate of infection, hospitalization, ICU admission and deaths compared to those who received the Pfizer/BioNtech vaccine.</p> |
| Area, 2021 [61]      | March 1st 2020- April 1, 2021 | International Journal of Environmental Research and Public Health | <p>To perform a descriptive statistical analysis of real data after one year of the pandemic in Galicia (Spain), by considering newly infected individuals, admissions to hospitals, admissions to intensive care units and deceased individuals.</p>                                                                                                                                                                                                        | Community            | NR                                                                 | Newly infected individuals, hospital and ICU admission, mortality                                                  | Alpha   | Spain   | There were more ICU admissions and mortality in the Alpha Wave compared to previous waves.                                                                                                                                                                                                                                                                                                                                          |
| Bager, 2021 [52]     | Jan 1- March 24, 2021         | The Lancet                                                        | <p>To assess the risk of COVID-19 hospitalisation in individuals infected with Alpha compared with those with other SARS-CoV-2 lineages</p>                                                                                                                                                                                                                                                                                                                  | Community & hospital | 35,887 test-positive individuals were identified, 11.6% with Alpha | Hospital admission within 14 days after a positive SARS-CoV-2 PCR test or 48hr before a positive test              | Alpha   | Denmark | Infection with Alpha was associated with an increased risk of hospitalisation compared with individuals infected with other lineages of SARS-CoV-2 virus.                                                                                                                                                                                                                                                                           |
| Budhiraja, 2021 [28] | April 2020 - June 2021        | medRxiv                                                           | To investigate the differences in the characteristics of the cases admitted in the second wave versus                                                                                                                                                                                                                                                                                                                                                        | Hospital             | N=14398 cases in first wave (2020)<br>N=5454 cases in              | Demographic profile, Clinical features (total cases; ICU/HDU admission; readmission; duration of                   | Delta   | India   | No significant demographic differences in the cases in these two waves, indicates the role of other factors such as                                                                                                                                                                                                                                                                                                                 |

| Author, date        | Date of data collection                                 | Source                                        | Objective                                                                                                                                                                                                                                                                                           | Setting   | Sample size                                                                                                                                                                                | Outcome measures                                                                 | Variant | Country | Main finding                                                                                                                                                                                                                                                    |
|---------------------|---------------------------------------------------------|-----------------------------------------------|-----------------------------------------------------------------------------------------------------------------------------------------------------------------------------------------------------------------------------------------------------------------------------------------------------|-----------|--------------------------------------------------------------------------------------------------------------------------------------------------------------------------------------------|----------------------------------------------------------------------------------|---------|---------|-----------------------------------------------------------------------------------------------------------------------------------------------------------------------------------------------------------------------------------------------------------------|
|                     |                                                         |                                               | those admitted in the first wave.                                                                                                                                                                                                                                                                   |           | second wave (2021)                                                                                                                                                                         | hospitalization; oxygen therapy; drug therapy), Mortality                        |         |         | Delta variant and late admissions in higher severity and more deaths.                                                                                                                                                                                           |
| Cetin, 2021 [45]    | April 2020 - March 2021                                 | Acta Microbiologica et Immunologica Hungarica | To collect and to analyze data related to the infection caused by different variants                                                                                                                                                                                                                | Hospital  | 3111 COVID-19 patients, 596 in-patients                                                                                                                                                    | Hospital stay time, case-fatality-rate, mortality                                | Alpha   | Turkey  | The Alpha variant increases the risk for hospitalization, increases the CFR for lower age group, and decreases the CFR for the upper age group                                                                                                                  |
| Challen, 2021 [53]  | Oct 1 <sup>st</sup> , 2021- Feb 12 <sup>th</sup> , 2021 | BMJ                                           | To establish whether there is any change in mortality from infection with Alpha compared with wild-type                                                                                                                                                                                             | Community | 54,906 matched cohort pairs (on age, sex, and ethnicity) of participants who tested positive for SARS-CoV-2                                                                                | Death within 28 days of the first positive SARS-CoV-2 test result                | Alpha   | UK      | Probability that the risk of mortality is increased by infection with Alpha is high; infection with Alpha has the potential to cause substantial additional mortality compared to wild-type                                                                     |
| Courjon, 2021 [46]  | Dec 2020-Feb 2021                                       | Nature                                        | To analyze modification in clinical profile and outcome traits when Alpha was emerging                                                                                                                                                                                                              | Hospital  | ED (n=1247) & Infectious disease ward or ICU (n=232)                                                                                                                                       | Profile of COVID-19 patients admitted in ED; Comparison of hospitalized patients | Alpha   | France  | There was no significant difference on time from first symptoms to ED admission, severity, need for immediate ICU management, ICU admission, or severity score on admission between Alpha and wild-type                                                         |
| Cusinato, 2021 [54] | Jan 1, 2020 and March 31, 2021                          | Infection                                     | To assess whether mortality of patients admitted for COVID-19 treatment was different in the second UK epidemic wave of COVID-19 compared to the first wave accounting for improvements in the standard of care available and differences in the distribution of risk factors between the two waves | Hospital  | 3 ,376 covid-19 positive cases, of these, 2,701 were patients admitted to covid-19 wards for treatment (32.7% (884 of 2701) in the first wave and 67.3% (1817 of 2701) in the second wave) | In-hospital covid-19-associated mortality and ICU admission                      | Alpha   | UK      | Although crude rates would indicate a lower in-hospital mortality during the second wave; accounting for differences in the distribution of protective and risk factors, suggests a higher risk of death during the second epidemic wave compared to the first. |

| Author, date                  | Date of data collection                                | Source  | Objective                                                                                                                                                          | Setting   | Sample size                                                                                                                               | Outcome measures                                                                     | Variant | Country | Main finding                                                                                                                                                                                                                                                                                                                                |
|-------------------------------|--------------------------------------------------------|---------|--------------------------------------------------------------------------------------------------------------------------------------------------------------------|-----------|-------------------------------------------------------------------------------------------------------------------------------------------|--------------------------------------------------------------------------------------|---------|---------|---------------------------------------------------------------------------------------------------------------------------------------------------------------------------------------------------------------------------------------------------------------------------------------------------------------------------------------------|
| Dabrera, 2021 [30]            | Oct 2020-Jan 2021                                      | SSRN    | To assess whether infection with Alpha were associated with more severe clinical outcomes compared to wild-type infection                                          | Community | 63,609 genomically sequenced COVID-19 cases                                                                                               | Risk in hospitalization and risk of mortality within 28 days of test                 | Alpha   | UK      | There was a 34% increased risk in hospitalization associated with Alpha compared to wild-type cases, however, no significant difference in the risk of mortality was found after adjusting for confounders.                                                                                                                                 |
| Davies, 2021 [77]             | Sep 1 <sup>st</sup> , 2020-Feb 14 <sup>th</sup> , 2021 | Nature  | To describe association between SGTF and hazard of death/disease severity                                                                                          | Community | 2,245,263 individuals with a positive test, 51.1% of which had a conclusive SGTF reading and, of these, 58.8% had SGTF (suggesting Alpha) | COVID-19 death occurring within 28 days of an individual's first positive COVID test | Alpha   | UK      | The hazard of death in the 28 days following a positive test is 55% (39–72%) higher for Alpha than for wild-type. Correcting for misclassification of SGTF and missing data on SGTF status, this increases to 61% (42–82%). Alpha is not only more transmissible than pre-existing SARS-CoV-2 variants but may also cause higher mortality. |
| de Andrade et al., 2021 [23]  | Feb 16 <sup>th</sup> 2020 - Feb 20, 2021               | medRxiv | To compare during the first year of the pandemic the age profile of patients hospitalized by COVID-19, as well as hospital mortality and use of ICUs, by age group | Hospital  | 720,36 completed records of patients hospitalized by COVID-19                                                                             | Hospital mortality and use of ICUs                                                   | Gamma   | Brazil  | Each geographical region of Brazil varied in terms of their mortality over the year, with the North region being the hardest hit, experiencing a collapse in the provision of healthcare in the first (initial introduction of wild-type) and last period (associated with Gamma) with high mortality in all age groups.                    |
| de Oliveira et al., 2021 [24] | Sep 1 <sup>st</sup> , 2020-Mar 17 <sup>th</sup> , 2021 | medRxiv | To assess recent trends in mortality data among different age-grouped populations in Brazil                                                                        | Community | 553,518 individuals infected with SARS- CoV-2 in Parana                                                                                   | CFRs                                                                                 | Gamma   | Brazil  | There was an 80-215% increased risk of mortality for adults in different age categories between 20-59 years                                                                                                                                                                                                                                 |

| Author, date          | Date of data collection    | Source                 | Objective                                                                                                                                                                                                                                                        | Setting                     | Sample size                   | Outcome measures                                                                                                                                                 | Variant                   | Country | Main finding                                                                                                                                                                                                                                                                                                 |
|-----------------------|----------------------------|------------------------|------------------------------------------------------------------------------------------------------------------------------------------------------------------------------------------------------------------------------------------------------------------|-----------------------------|-------------------------------|------------------------------------------------------------------------------------------------------------------------------------------------------------------|---------------------------|---------|--------------------------------------------------------------------------------------------------------------------------------------------------------------------------------------------------------------------------------------------------------------------------------------------------------------|
|                       |                            |                        |                                                                                                                                                                                                                                                                  |                             | between Sep 2020 and Mar 2021 |                                                                                                                                                                  |                           |         | between Feb 2020 and Jan 2021, when Gamma was prominent.                                                                                                                                                                                                                                                     |
| Dennis, 2021 [55]     | Mar 1, 2020 - Jan 31, 2021 | Critical Care Medicine | To determine whether the previously described trend of improving mortality in people with COVID-19 in critical care during the first wave was maintained, plateaued, or reversed during the second wave in United Kingdom, when Alpha became the dominant strain | All English hospital trusts | 49,862                        | In-hospital 28-day mortality by calendar month of admission                                                                                                      | Alpha                     | UK      | There was a marked deterioration in outcomes for patients admitted to critical care at the peak of the second wave of COVID-19 in United Kingdom, compared with the post-first-wave period.                                                                                                                  |
| Di Domenico, 2021[75] | Jan 7-8 2021               | Eurosurveillance       | To assess the impact of implemented measures on two COVID strains (i.e., Alpha and wild-type) through modeling                                                                                                                                                   | Community                   | N/A                           | Estimated number cases of wild-type and Alpha based on social distancing measures using data from a large-scale genome sequencing initiative conducted in France | Alpha                     | France  | Social distancing implemented in Jan 2021 would bring down the R of historical strain, however VOC would continue to increase. School holidays also slowed down dynamics. Accelerating vaccinations will help but won't be sufficient to stop the spread of the VOC, even with optimistic vaccination rates. |
| Erman, 2021 [31]      | Jan 1 - Apr 9, 2021        | medRxiv                | To estimate healthcare resource use and health outcomes attributable to VOCs introduced to Ontario between January 1 and April 9, 2021, relative to the previously circulating wild-type strain                                                                  | Hospital                    | 77,200 subjects               | VOC-attributable odds of hospitalisation, ICU admission and death among all infected subjects in the general COVID-19 population                                 | Alpha, Beta, Gamma        | Canada  | This study demonstrates worse outcomes for patients with VOC. Health systems may face increased demand for healthcare resources as VOC predominate worldwide in view of low global vaccination coverage.                                                                                                     |
| Fisman, 2021 [32]     | Feb 7 - June 22, 2021      | medRxiv                | To evaluate the virulence of VOC compared to non-VOC SARS-CoV-2 infections                                                                                                                                                                                       | Community and hospital      | 212,332                       | Risk of hospitalization, intensive care unit (ICU) admission, and death                                                                                          | Alpha, Beta, Gamma, Delta | Canada  | The progressive increase in transmissibility and virulence of VOC will result in a significantly larger, and more deadly, pandemic than would                                                                                                                                                                |

| Author, date        | Date of data collection                                 | Source             | Objective                                                                                                                                                 | Setting   | Sample size                                                                                                              | Outcome measures                                                                                                                                               | Variant | Country | Main finding                                                                                                                                                                                                                                                                                                                                                                                                                                                                                                                                                                                                                                                                                                                                                                                                                                                                                                                                                                                                     |
|---------------------|---------------------------------------------------------|--------------------|-----------------------------------------------------------------------------------------------------------------------------------------------------------|-----------|--------------------------------------------------------------------------------------------------------------------------|----------------------------------------------------------------------------------------------------------------------------------------------------------------|---------|---------|------------------------------------------------------------------------------------------------------------------------------------------------------------------------------------------------------------------------------------------------------------------------------------------------------------------------------------------------------------------------------------------------------------------------------------------------------------------------------------------------------------------------------------------------------------------------------------------------------------------------------------------------------------------------------------------------------------------------------------------------------------------------------------------------------------------------------------------------------------------------------------------------------------------------------------------------------------------------------------------------------------------|
| Frampton, 2021 [56] | Nov 9 <sup>th</sup> ,<br>Dec 20 <sup>th</sup> ,<br>2020 | Lancet             | To describe emergence of Alpha in two North Central London hospitals including comparing virological characteristics and clinical outcomes                | Hospital  | Of 496 patients with samples positive for SARS-CoV-2 on PCR, 341 had samples that could be sequenced. 58% had Alpha      | Severe disease (defined as point 6 or higher on the WHO ordinal scale within 14 days of symptoms or positive test) and death within 28 days of a positive test | Alpha   | UK      | have occurred in the absence of VOC emergence. This is demonstrated by increased hospitalizations and deaths.<br>While length of stay, risk of hospitalization within 14 days of a test, and time to hospital admission from symptom onset were similar, patients with Alpha were younger, had fewer comorbidities and more likely to be from an ethnic minority. There was no increased risk of mortality or severe disease with Alpha compared to wild-type.<br>Findings suggest that simultaneously with the emergence of Gamma in the state of Amazonas, there was an increase in the proportion of deaths in women and in the populations between 20 and 59 years of both sexes. There were also relative increases in the different age groups and genders in the mortality, lethality, and hospital lethality rates.<br>There was an increase in the proportion of young people and people without previous illnesses among severe cases and deaths after the identification of the local transmission of |
| Freitas, 2021 [27]  | Apr 2020-Mar 1 <sup>st</sup> , 2021                     | SciELO - Preprints | To describe and identify potential changes in the mortality profile associated temporally with the emergence of the Gamma strain in the state of Amazonas | Community | In the first wave of the COVID-19 pandemic in Amazonas, 46,342 cases were recorded and, in the second wave, 61,273 cases | Demographic data, clinical data, comorbidities, hospitalization, ICU admission, need ventilatory support, hospital outcomes                                    | Gamma   | Brazil  |                                                                                                                                                                                                                                                                                                                                                                                                                                                                                                                                                                                                                                                                                                                                                                                                                                                                                                                                                                                                                  |
| Freitas, 2021 [29]  | Nov 2020-Feb 2021                                       | medRxiv            | To provide an epidemiological analysis describing and comparing the severity and mortality profile of COVID-19 cases considering two periods              | Community | 230,986 cases of COVID-19 were confirmed in the first wave and 150,942 cases in the second wave                          | Demographic data, presence of pre-existing conditions, onset of symptoms, hospitalization, and hospital outcome, as well as data on the                        | Gamma   | Brazil  |                                                                                                                                                                                                                                                                                                                                                                                                                                                                                                                                                                                                                                                                                                                                                                                                                                                                                                                                                                                                                  |

| Author, date      | Date of data collection                                 | Source                       | Objective                                                                                                                                                 | Setting   | Sample size                                                                                                                                  | Outcome measures                                                                                                                                                         | Variant            | Country                                                            | Main finding                                                                                                                                                                                                                                                                |
|-------------------|---------------------------------------------------------|------------------------------|-----------------------------------------------------------------------------------------------------------------------------------------------------------|-----------|----------------------------------------------------------------------------------------------------------------------------------------------|--------------------------------------------------------------------------------------------------------------------------------------------------------------------------|--------------------|--------------------------------------------------------------------|-----------------------------------------------------------------------------------------------------------------------------------------------------------------------------------------------------------------------------------------------------------------------------|
|                   |                                                         |                              | before and after the emergence of Gamma                                                                                                                   |           |                                                                                                                                              | occupation of ward beds and ICU beds                                                                                                                                     |                    |                                                                    | variant Gamma. There was also an increase in the proportion of severe cases and in the CFR, in almost all subgroups analyzed. This increase was heterogeneous in different age groups and sex.                                                                              |
| Funk, 2021 [62]   | Weeks 38/2020-10/2021                                   | Euro Surveillance            | To analyze COVID-19 cases infected with any of the three severe VOC (Alpha, Beta, Gamma) and compare them with wild-type with a focus on disease severity | Community | 23,343 had information on SARS-CoV-2 variants, of which 19,995 were VOC and 3,348 wild-type cases included                                   | Information on sex, age, clinical symptoms, pre-existing conditions, hospital and ICU admission and outcome (i.e., survived or died).                                    | Alpha, Beta, Gamma | Cyprus, Estonia, Finland, Ireland, Italy, Luxembourg, and Portugal | An increased risk for hospitalizations and ICU admission was associated with all three VOC.                                                                                                                                                                                 |
| Garvey, 2021 [63] | Dec 15 <sup>th</sup> -31 <sup>st</sup> , 2020           | Journal of Infection         | To report, observations and outcomes of Alpha infected patients admitted to UHB during Dec 2020                                                           | Hospital  | 152 - 79 were Alpha and 1 was Beta                                                                                                           | Clinical outcomes: hospital length of stay, critical care admission, critical care length of stay, treatment given for COVID-19, oxygen and ventilatory support, & death | Alpha, Beta        | UK                                                                 | Alpha was associated with younger age; an increased proportion of patients being admitted to critical care for longer periods, but the association wasn't statistically significant. Whilst numbers of patients were relatively low, no increase in mortality was observed. |
| Graham, 2021 [64] | Sep 8 <sup>th</sup> -Dec 31 <sup>st</sup> , 2020        | Lancet Public Health         | To examine the association between the regional proportion of Alpha and reported symptoms, disease course, rates of reinfection, and transmissibility     | Community | 36,920 COVID-19 positive users of the COVID symptom app. Surveillance data from the (COG-UK) and a SGTF correlate in community testing data. | Regional proportion of Alpha and symptoms, disease course, rates of reinfection and transmissibility.                                                                    | Alpha              | UK                                                                 | No evidence of changes in reported symptoms, disease severity and disease duration associated with Alpha.                                                                                                                                                                   |
| Grint, 2021 [57]  | Nov 16 <sup>th</sup> , 2020-Jan 11 <sup>th</sup> , 2021 | Clinical Infectious Diseases | To describe the severity of the Alpha variant in terms of the pathway of disease from testing                                                             | Community | 185,234 people tested positive for SARS-CoV-2 in the community                                                                               | All-cause mortality based on relative hazard of death ratio and absolute risk of death by 28 days                                                                        | Alpha              | England                                                            | Alpha was associated with two-thirds higher case fatality than wild-type in this unvaccinated population.                                                                                                                                                                   |

| Author, date         | Date of data collection                          | Source               | Objective                                                                                                                                                                                                                                                                                    | Setting   | Sample size                                                                                                                                                                                                                                      | Outcome measures                                                                                                                                    | Variant                     | Country               | Main finding                                                                                                                                                                                                                                                                                            |
|----------------------|--------------------------------------------------|----------------------|----------------------------------------------------------------------------------------------------------------------------------------------------------------------------------------------------------------------------------------------------------------------------------------------|-----------|--------------------------------------------------------------------------------------------------------------------------------------------------------------------------------------------------------------------------------------------------|-----------------------------------------------------------------------------------------------------------------------------------------------------|-----------------------------|-----------------------|---------------------------------------------------------------------------------------------------------------------------------------------------------------------------------------------------------------------------------------------------------------------------------------------------------|
| Haas, 2021 [58]      | Jan 24 <sup>th</sup> -Mar 6 <sup>th</sup> , 2021 | Lancet               | positive to hospital admission and death<br><br>To provide nationwide estimates of the effectiveness of two doses of Pfizer against SARS-CoV-2 outcomes, and document the first nationwide public-health impact following the widespread introduction of the vaccine at the population level | Community | (Alpha = 93 153; wild-type = 92 081)<br>There were 202 684 SARS-CoV-2 infections in Israel, of which 93.9% was Alpha. There were 6,040 hospitalizations, 3,470 severe and critical hospitalizations, and 754 deaths among persons aged >15 years | Range of SARS-CoV-2 outcomes, including all SARS-CoV-2 infections (symptomatic and asymptomatic), hospitalizations (severe and critical) and deaths | Alpha                       | Israel                | Two doses of Pfizer >7 days after admission were highly effective in preventing hospitalizations, severe and critical hospitalizations, and deaths at a time when Alpha was the dominant strain.                                                                                                        |
| Havers, 2021 [41]    | Jan 1–June 30, 2021                              | medRxiv              | To examine characteristics associated with vaccination breakthrough                                                                                                                                                                                                                          | hospital  | 4,732 cases with hospitalization associated primarily with COVID-19 illness, including 4,440 unvaccinated and 292 fully vaccinated cases                                                                                                         | Descriptive characteristics, vaccination status, hospitalization                                                                                    | Delta                       | USA                   | Population-based hospitalization rates show that unvaccinated adults aged ≥18 years are 17 times more likely to be hospitalized compared with vaccinated adults. Rates are far higher in unvaccinated persons in all adult age groups, including during a period when Delta was the predominant strain. |
| Jabłońska, 2021 [26] | June 2020 - Feb 25 <sup>th</sup> , 2021          | medRxiv              | To detect potential association between COVID-19 mortality and proportion of Alpha through the second wave of the pandemic in Europe with the use of multivariate regression models                                                                                                          | Community | A dataset of 3971 SARS-CoV-2 virus strains identified between Dec 2019 and Mar 2021                                                                                                                                                              | COVID-19 deaths during the second wave                                                                                                              | Alpha and 11 other variants | 38 European countries | Findings suggest that the development and spread of Alpha had a significant impact on the mortality during the second wave of COVID-19 pandemic in Europe.                                                                                                                                              |
| Jassat, 2021 [59]    | Mar 5, 2020 - Mar 27, 2021                       | Lancet Global Health | The aim is to compare in-hospital mortality and other patient characteristics between the first and second                                                                                                                                                                                   | Hospital  | 1,545,431 SARS-CoV-2 cases and 227,932 COVID-19                                                                                                                                                                                                  | Hospital admissions, deaths                                                                                                                         | Beta                        | South Africa          | In South Africa, the second wave was associated with higher incidence of COVID-19, more rapid increase in                                                                                                                                                                                               |

| Author, date              | Date of data collection                                | Source                                    | Objective                                                                                                                                           | Setting   | Sample size                                                                                                                     | Outcome measures                                                                                                                                                                                                 | Variant | Country | Main finding                                                                                                                                                                                                                         |
|---------------------------|--------------------------------------------------------|-------------------------------------------|-----------------------------------------------------------------------------------------------------------------------------------------------------|-----------|---------------------------------------------------------------------------------------------------------------------------------|------------------------------------------------------------------------------------------------------------------------------------------------------------------------------------------------------------------|---------|---------|--------------------------------------------------------------------------------------------------------------------------------------------------------------------------------------------------------------------------------------|
|                           |                                                        |                                           | waves, with reference to Beta                                                                                                                       |           | hospital admissions                                                                                                             |                                                                                                                                                                                                                  |         |         | admissions to hospital, and increased in-hospital mortality. This is felt to be multifactorial including system pressure, however Beta variant felt to be significant contributor to increasing mortality rates.                     |
| Khedar, 2021 [42]         | Mar 2020 - July 2021                                   | medRxiv                                   | To compare demographic, clinical and laboratory features and outcomes in the second Covid-19 wave in India (driven by Delta) with the previous wave | Hospital  | First wave: 7476 tested, 1395 COVID-positive, 863 hospitalized; Second wave: 8680 tested, 1641 COVID-positive, 388 hospitalized | Descriptive characteristics, hospitalizations, in-hospital interventions, ICU admissions, deaths                                                                                                                 | Delta   | India   | Patients admitted during the second wave had greater length of stay in intensive care unit, oxygen requirement, non-invasive and invasive ventilatory support. The in-hospital mortality in the second wave was double of the first. |
| Loconsole, 2021 [47]      | Dec 22 <sup>nd</sup> , 2020-Mar 9 <sup>th</sup> , 2021 | Environmental Research and Public Health  | To evaluate the spread of Alpha in southern Italy from Dec 2020-Mar 2021                                                                            | Community | 3,075                                                                                                                           | Positive SGTF detection, symptomology (i.e., hospitalization) Demographics, ICU scores, comorbidities, biological data, chest computed                                                                           | Alpha   | Italy   | Alpha cases were more likely to be symptomatic and to result in hospitalization.                                                                                                                                                     |
| Louis, 2021 [48]          | Feb 3rd - March 16th 2021                              | Anaesthesia Critical Care & Pain Medicine | To report the preliminary observational data of consecutive COVID-19 critically ill patients infected by Beta                                       | Hospital  | 104                                                                                                                             | tomodensitometry and clinical outcomes of patients were compared across variant strains (V1, V2 and wild-type) Primary outcome: proportion of participants with a severe form of COVID-19 occurring up to day 29 | Beta    | France  | Beta was associated with high short-term mortality and could be more pathogenic than Alpha.                                                                                                                                          |
| Martin-Blondel, 2021 [33] | Jan 1st - Feb 28, 2021                                 | SSRN                                      | To assess the effect of Alpha on severity in comparison to other COVID-19 lineages                                                                  | Hospital  | 650 with alpha, 650 with other lineages                                                                                         | 30 after the date of hospitalization (severity as defined by WHO clinical progression scale); Secondary outcomes: mortality,                                                                                     | Alpha   | France  | Alpha is associated with increased risk of hospitalization in younger patients and severity in patients that are less comorbid and may lead to increased mortality.                                                                  |

| Author, date               | Date of data collection                                | Source         | Objective                                                                                                                                                                                     | Setting                            | Sample size                                                                                                                                                                                | Outcome measures                                                                                                                                                                                      | Variant                   | Country      | Main finding                                                                                                                                                                                                                                                      |
|----------------------------|--------------------------------------------------------|----------------|-----------------------------------------------------------------------------------------------------------------------------------------------------------------------------------------------|------------------------------------|--------------------------------------------------------------------------------------------------------------------------------------------------------------------------------------------|-------------------------------------------------------------------------------------------------------------------------------------------------------------------------------------------------------|---------------------------|--------------|-------------------------------------------------------------------------------------------------------------------------------------------------------------------------------------------------------------------------------------------------------------------|
| Martinez-Garcia, 2021 [49] | Jan 2nd t-Apr 30th, 2021                               | Microorganisms | To evaluate how Alpha has replaced the other ones circulating in our geographic area & to study its transmissibility and the associated burden of disease                                     | Hospital                           | 27,633                                                                                                                                                                                     | admission to ICU, invasive ventilation and other clinical statistics of interest<br><br>Prevalence of Alpha and proportion in comparison to other strains; Burden of disease in hospitalized patients | Alpha                     | Spain        | Alpha is associated with increased hospitalization and more severe infection, and individuals infected with this variant have a higher need for ICU and IRCU admission.                                                                                           |
| Maslo, 2021 [43]           | June 14 - Dec 19, 2020                                 | medRxiv        | To assess characteristics, severity of illness and mortality in patients hospitalised during the second wave and compared this with those hospitalised in the first wave                      | Hospital                           | 303 patients in the first wave, 357 in the second                                                                                                                                          | Patient characteristics, therapy, highest level of care, ventilation requirements, length of stay, mortality and laboratory data                                                                      | Beta                      | South Africa | Beta is possibly more virulent, with increased mortality and higher ICU mortality.                                                                                                                                                                                |
| McAlister, 2021 [34]       | Mar 1, 2020 - Mar 31, 2021                             | medRxiv        | To examine 30-day outcomes in Canadians infected with SARS-CoV-2 in the first year of the pandemic and to compare event rates in those with VOC versus wild-type infection                    | Community                          | 104,232 (in wave 3)                                                                                                                                                                        | All cause hospitalization or death within 30 days of positive test                                                                                                                                    | Alpha, Beta, Gamma, Delta | Canada       | There was a shift towards younger age groups getting infected in the third wave, resulting in more hospitalizations but shorter length of stay. On an individual basis, VOC infection was associated with higher risk of hospitalization or death than wild-type. |
| Mitze and Rode, 2021 [76]  | Dec 15 <sup>th</sup> , 2020-Feb 4 <sup>th</sup> , 2021 | MedRxiv        | To provide estimates of the epidemiological trends associated with the reporting of Alpha and wild-type for two key indicators: i) the 7-day incidence rate, and ii) the hospitalization rate | Community & hospital (linked data) | Data on daily SARS-CoV-2 infection data for each of the health regions from the COVID-19 dashboard of the Robert Koch Institute. The number of hospitalized patients in ICU was taken from | Comparing the development in epidemiological outcome variables of two groups (wild-type and Alpha). Outcomes of interest were i) the 7-day incidence rate and ii) the hospitalization rate.           | Pooled information on VOC | Germany      | There was a significant increase in the hospitalization rate in regions in the top 10% percentile of reported VOC cases with an estimated increase of 1.29 [CI: 0.5, 2.1] additional COVID-19 patients in intensive care per 100,000 population.                  |

| Author, date      | Date of data collection     | Source                                       | Objective                                                                                                                                                                                                                                                                                     | Setting                                                                   | Sample size                                                                                   | Outcome measures                                                                                                                                                                                | Variant            | Country   | Main finding                                                                                                                                                                                                            |
|-------------------|-----------------------------|----------------------------------------------|-----------------------------------------------------------------------------------------------------------------------------------------------------------------------------------------------------------------------------------------------------------------------------------------------|---------------------------------------------------------------------------|-----------------------------------------------------------------------------------------------|-------------------------------------------------------------------------------------------------------------------------------------------------------------------------------------------------|--------------------|-----------|-------------------------------------------------------------------------------------------------------------------------------------------------------------------------------------------------------------------------|
| Moore, 2021 [25]  | Mar 1, 2020 - Feb 28, 2021  | medRxiv                                      | To analyze the Israeli data on COVID-19 to determine whether the Alpha variant produced a higher fatality rate                                                                                                                                                                                | Community                                                                 | NR                                                                                            | Mortality and case fatality rates on a weekly basis                                                                                                                                             | Alpha              | Israel    | Although Alpha variant appears more transmissible, findings suggest that it is not more deadly once a patient is infected.                                                                                              |
| Nonaka, 2021 [73] | May 2020 - February 2021    | International Journal of Infectious Diseases | To evaluate changes in the characteristics of patients with COVID19 after the emergence of the Gamma, by comparing the clinical, demographic, and laboratory profiles of patients hospitalized during the first (May to July 2020) and second (December 2020 to February 2021) pandemic waves | Hospital                                                                  | 4,164                                                                                         | Confirmed COVID-19 hospitalizations, ICU admissions, clinical (comorbidities) and demographic profiles                                                                                          | Gamma              | Brazil    | An increased proportion of younger adults without comorbidities with severe disease during the second COVID-19 wave, shortly after the confirmation of local Gamma circulation.                                         |
| Nyberg, 2021 [60] | Nov 23, 2020- Jan31, 2021   | BMJ Open                                     | To evaluate the relation between diagnosis of COVID-19 with Alpha and the risk of hospital admission compared with diagnosis with wild-type                                                                                                                                                   | Community based testing, individually linked with hospital admission data | 839,278 with laboratory confirmed COVID-19 of whom 36,233 admitted to hospital within 14 days | Hospital admission between 1 and 14 days after first positive test                                                                                                                              | Alpha              | England   | Risk of hospital admission is higher for people infected with the Alpha variant compared with wild-type, likely reflecting a more severe disease, and this higher severity may be specific to adults over 30 years old. |
| Ong, 2021 [65]    | Dec 20, 2020 - May 12, 2021 | Clinical Infectious Diseases                 | To compare outcomes of patients infected with Alpha, Beta, and Delta with those with wild-type, with the aim of improving our understanding of the relationship between viral variants, disease severity and viral shedding kinetics                                                          | Hospital                                                                  | 2,930 confirmed cases; 829 VOC                                                                | Primary outcomes development of pneumonia, oxygen requirement, ICU admission, and death. Secondary outcomes were comparison of viral PCR Ct values and duration of viral shedding between VOCs. | Alpha, Beta, Delta | Singapore | An association was found between Delta and increased disease severity.                                                                                                                                                  |

| Author, date       | Date of data collection                                 | Source       | Objective                                                                                                                                                      | Setting                            | Sample size                                                                                                                                                                                                                                                                                                                                                                                                                                                                  | Outcome measures                                                                                                                                                                                                                                                             | Variant | Country     | Main finding                                                                                                                                                                                                        |
|--------------------|---------------------------------------------------------|--------------|----------------------------------------------------------------------------------------------------------------------------------------------------------------|------------------------------------|------------------------------------------------------------------------------------------------------------------------------------------------------------------------------------------------------------------------------------------------------------------------------------------------------------------------------------------------------------------------------------------------------------------------------------------------------------------------------|------------------------------------------------------------------------------------------------------------------------------------------------------------------------------------------------------------------------------------------------------------------------------|---------|-------------|---------------------------------------------------------------------------------------------------------------------------------------------------------------------------------------------------------------------|
| Pascall, 2021 [66] | Nov 1, 2020 - Jan 30, 2021                              | MedRxiv      | To quantify the clinical features and rate of spread of Alpha infections in Scotland in a comprehensive national dataset                                       | Hospital and community cases       | 1,475 (364 with Alpha); 59% of sample hospitalized and 41% community                                                                                                                                                                                                                                                                                                                                                                                                         | Clinical outcomes by 28 days using a 4-point scale of maximum severity: 1. no respiratory support, 2. oxygen, 3. ventilation and 4. death                                                                                                                                    | Alpha   | Scotland    | Alpha variant associated with more severe clinical disease.                                                                                                                                                         |
| Patone, 2021 [67]  | Nov 1 <sup>st</sup> , 2020- Jan 27 <sup>th</sup> , 2021 | The Lancet   | To estimate the risk of critical care admission, mortality in critically ill patients, and overall mortality associated with Alpha compared with the wild-type | Community & hospital (linked data) | <p>The 'primary care cohort' was patients in primary care with a positive community COVID-19 test reported between 1 November 2020 and 26 January 2021. The first cohort included 198,420 patients. Of these, 117926 had Alpha.</p> <p>The 'critical care cohort' was patients admitted for critical care with a positive community COVID-19 test reported between 1 November 2020 and 27 January 2021. 4272 had SGTF status and were included. Of these, 2685 had Alpha</p> | For the primary care cohort, critical care and 28-day mortality. For the critical care cohort, duration of organ support (respiratory, cardiovascular, renal, neurological and liver) in critical care, duration of critical care and mortality at the end of critical care. | Alpha   | England     | Patients with Alpha were at increased risk of ICU admission and 28-day mortality compared with patients with non-Alpha. For patients receiving critical care, mortality appeared to be independent of virus strain. |
| Pham, 2021 [80]    | Feb-Aug 2020                                            | BMC Medicine | To explore the effectiveness of different infection prevention strategies for                                                                                  | Hospital                           | N/A                                                                                                                                                                                                                                                                                                                                                                                                                                                                          | The effective reproduction number for patients and HCWs. Also measured HCW                                                                                                                                                                                                   | Alpha   | Netherlands | In response to the emergence of more transmissible VOC, universal PPE use in all                                                                                                                                    |

| Author, date     | Date of data collection  | Source                 | Objective                                                                                                                                                                                                                                                                         | Setting                                                                | Sample size                                                                                                              | Outcome measures                                                                                                                                                                                                                                                                                                                                                                                                                                                                                                                                                                                                 | Variant     | Country | Main finding                                                                                                                                                                                                                                                                                                                                                                                                                                                                                                                                                                                                                                |
|------------------|--------------------------|------------------------|-----------------------------------------------------------------------------------------------------------------------------------------------------------------------------------------------------------------------------------------------------------------------------------|------------------------------------------------------------------------|--------------------------------------------------------------------------------------------------------------------------|------------------------------------------------------------------------------------------------------------------------------------------------------------------------------------------------------------------------------------------------------------------------------------------------------------------------------------------------------------------------------------------------------------------------------------------------------------------------------------------------------------------------------------------------------------------------------------------------------------------|-------------|---------|---------------------------------------------------------------------------------------------------------------------------------------------------------------------------------------------------------------------------------------------------------------------------------------------------------------------------------------------------------------------------------------------------------------------------------------------------------------------------------------------------------------------------------------------------------------------------------------------------------------------------------------------|
|                  |                          |                        | HCWs in hospitals in the absence of vaccination using an agent-based model of nosocomial SARS-CoV-2 transmission                                                                                                                                                                  |                                                                        |                                                                                                                          | absenteeism and numbers of nosocomial infections                                                                                                                                                                                                                                                                                                                                                                                                                                                                                                                                                                 |             |         | hospital wards is the most effective in preventing nosocomial transmission and is the most effective intervention to reduce the reproduction number and absenteeism. Regular screening and contact tracing of HCWs are also effective interventions, but critically depend on the sensitivity of the diagnostic test used. Mortality was higher in patients with ARF infected with Beta than in patients infected with wildtype. Given that there were optimal management conditions, the excess mortality observed in the study cohort is likely explained by the increased virulence of the Beta variant relative to the original strain. |
| Puech, 2021 [35] | Mar 1 2020 - Apr 18 2021 | Research Square        | To compare the prognosis of patients with ARF due to Beta to that of patients with ARF due to wild type                                                                                                                                                                           | Three hospital ICUs (in the Reunion Island University Hospital system) | 218 nasopharyngeal or respiratory samples                                                                                | The primary outcome was 28-day in-hospital mortality. The secondary outcomes were the occurrence of pulmonary embolism, the occurrence of hospital acquired pneumonia, the need for venovenous extracorporeal membrane oxygenation support, and in-ICU length of stay. Presence of SARS-CoV-2 on high-touch environmental surfaces; Persistence of SARS-CoV-2 on different inanimate surfaces after using disinfectants; Spread of the disease was measured in both the wards with confirmed cases as well as the non-infectious wards; amount of disposable plastic waste generated by diagnostic tests and PPE | Beta        | France  | Beta can survive on inanimate surfaces after disinfection with alcohol-based hand runs (ethanol 70%) up to 5 minutes but in most cases, not more than 15 minutes. An increased level in plastic waste was inevitable.                                                                                                                                                                                                                                                                                                                                                                                                                       |
| Seif, 2021 [81]  | April 23, 2021           | Environmental Research | To determine the presence of the virus on regularly-touched environmental surfaces, as well as the persistence of the virus to two common types of disinfectants, and finally, to estimate the plastic waste produced by the real-time PCR test and its operators in the hospital | Hospital                                                               | 76 samples from environmental surfaces that were obtained from different hospital wards before disinfection and cleaning |                                                                                                                                                                                                                                                                                                                                                                                                                                                                                                                                                                                                                  | Alpha, Beta | Iran    |                                                                                                                                                                                                                                                                                                                                                                                                                                                                                                                                                                                                                                             |

| Author, date        | Date of data collection                                     | Source                        | Objective                                                                                                                                                                                                                        | Setting   | Sample size                                                                                                                                | Outcome measures                                                                                                                                                                                                   | Variant      | Country                      | Main finding                                                                                                                                                                                                                                                                                            |
|---------------------|-------------------------------------------------------------|-------------------------------|----------------------------------------------------------------------------------------------------------------------------------------------------------------------------------------------------------------------------------|-----------|--------------------------------------------------------------------------------------------------------------------------------------------|--------------------------------------------------------------------------------------------------------------------------------------------------------------------------------------------------------------------|--------------|------------------------------|---------------------------------------------------------------------------------------------------------------------------------------------------------------------------------------------------------------------------------------------------------------------------------------------------------|
| Snell, 2021 [40]    | Mar 13 <sup>th</sup> , 2020 and Feb 17 <sup>th</sup> , 2021 | medRxiv                       | To compare admission characteristics of hospitalized cases during the two dominant waves of infection for local healthcare planning                                                                                              | Hospital  | 2341 total; 838 in wave 1 and 1503 in wave two                                                                                             | Comparison of demographic, physiological and laboratory parameters of hospitalized SARS-CoV-2 positive cases during Wave 1/wild-type and Wave2/Alpha extracted from hospital electronic health record              | Alpha        | UK                           | While there was double the admissions in Wave 2 (Alpha), patients with Alpha were similar in age and ethnicity compared to wild-type. Alpha patients were less likely to be frail but more likely to be obese hypoxic on admission, the main indicator of severe disease, than patients with wild-type. |
| Stirrup, 2021 [68]  | Nov 16, 2020 - Jan 10, 2021                                 | BMJ Open Respiratory Research | To estimate the overall effect of Alpha on mortality and ICU admission and to evaluate whether the impact of the variant differed according to patient characteristics                                                           | Hospital  | Sequences were obtained from 2341 inpatients and analysis of clinical outcomes was carried out in 2147 inpatients with all data available. | Mortality and Intensive Therapy Unit admission (both in patients admitted with COVID-19 and hospital onset COVID-19 infections)                                                                                    | Alpha        | UK                           | Alpha was not associated with an overall increase in mortality among hospitalised patients. However, Alpha may be associated with higher ICU admission and death in females compared with non-Alpha.                                                                                                    |
| Swann, 2021 [36]    | Jan 17, 2020 - Jan 31, 2021                                 | medRxiv                       | To characterise and compare the clinical features and outcomes of children and young people aged <19 years who were hospitalised with SARS-CoV-2 infection during the first and second waves across England, Scotland, and Wales | Hospitals | 2044 children and young people aged <19 years were reported from 187 hospitals                                                             | Primary outcomes: Admission to critical care; development of Multisystem Inflammatory Syndrome in Children (MIS-C); and in-hospital mortality for children and young people with symptomatic SARS-CoV-2 infection. | Alpha        | England, Scotland, and Wales | Severe disease in children and young people admitted with symptomatic SARS-CoV-2 in the UK remains rare. One in five in this cohort had asymptomatic/incidental SARS-CoV-2 infection. No evidence of increased disease severity was found in wave 2 compared with wave 1.                               |
| Takemoto, 2021 [51] | Mar 2020-Apr 12 <sup>th</sup> , 2021                        | medRxiv                       | To examine impact of Gamma variant on obstetric population in Brazil                                                                                                                                                             | Community | 8,248 COVID-19 maternal SARS cases                                                                                                         | Confirmed maternal deaths in women 10-50 years old                                                                                                                                                                 | Gamma        | Brazil                       | The number of COVID-19 maternal deaths increased significantly (7.4% vs 15.6%) from 2020 to 2021 in Brazil.                                                                                                                                                                                             |
| Twohig, 2021 [69]   | Mar 29 - May 23, 2021                                       | Lancet Infectious Diseases    | To characterise the severity of the delta variant compared with                                                                                                                                                                  | Community | 43,338 COVID-19-positive patients (8,682                                                                                                   | The risk for hospital admission and                                                                                                                                                                                | Alpha, Delta | UK                           | There was higher hospital admission or emergency care                                                                                                                                                                                                                                                   |

| Author, date         | Date of data collection         | Source                       | Objective                                                                                                                                                                                                                                       | Setting   | Sample size                                                                                                              | Outcome measures                                                                                                           | Variant            | Country | Main finding                                                                                                                                                                                                             |
|----------------------|---------------------------------|------------------------------|-------------------------------------------------------------------------------------------------------------------------------------------------------------------------------------------------------------------------------------------------|-----------|--------------------------------------------------------------------------------------------------------------------------|----------------------------------------------------------------------------------------------------------------------------|--------------------|---------|--------------------------------------------------------------------------------------------------------------------------------------------------------------------------------------------------------------------------|
|                      |                                 |                              | the Alpha variant by determining the relative risk of hospital attendance outcomes                                                                                                                                                              |           | with the delta variant, 34,656 with the alpha variant)                                                                   | emergency care attendance                                                                                                  |                    |         | attendance risk for patients with COVID-19 infected with the Delta variant compared with the Alpha variant.                                                                                                              |
| Vassallo, 2021 [37]  | Oct 2020-Apr 2021               | Journal of Clinical Medicine | To collect the clinical and demographic characteristics of patients admitted to a medical department for COVID-19 due to Alpha and to compare these data with those of patients admitted for COVID-19 due to wild-type during the previous wave | Hospital  | 158 patients (65 with Alpha, 93 with wild-type)                                                                          | Clinical characteristics (e.g., admission to ICU, death) and severity of disease, measured by a list of laboratory markers | Alpha              | France  | Alpha had 3.8-fold higher risk of death or transfer to the ICU compared to wild-type.                                                                                                                                    |
| Veneti, 2021 [70]    | Dec 28, 2020 - June 8, 2021     | PLOS One                     | To estimate the risk of hospitalisation and ICU admission for Alpha and Beta in Norway, compared to non-VOC                                                                                                                                     | Community | 28,301 known VOC (Alpha or Beta) or non-VOC cases were included in the analysis (of an original 65,040 identified cases) | Rate of hospitalization and ICU admission                                                                                  | Alpha, Beta        | Norway  | There is a higher risk of severe disease among people infected with Alpha or Beta, compared to non-VOC                                                                                                                   |
| Veneti, 2021 [71]    | May 3 2021 - August 15 2021     | medRxiv                      | To estimate the risk of hospitalisation among reported cases of Delta compared to Alpha in Norway                                                                                                                                               | Community | 7,977 cases of Delta and 12,078 cases of Alpha (20,055 total)                                                            | Rate of hospitalization, vaccination status                                                                                | Alpha, Delta       | Norway  | No observed difference in risk of hospitalization between Delta versus Alpha cases.                                                                                                                                      |
| Whittaker, 2021 [72] | Dec 21st 2020 - April 25th 2021 | Journal of Infection         | To compare the trajectory of hospitalized patients with Alpha compared with other variants                                                                                                                                                      | Hospital  | 1,186 patients (946 Alpha, 157 non-VOC, 27 (Beta, Gamma, & Kappa), 53 could not be distinguished)                        | Length of stay in hospital and ICU, mortality                                                                              | Alpha, Beta, Gamma | Norway  | No difference was found in the time from symptom onset to hospitalization, length of stay in hospital and ICU, nor odds of mortality up to 30 days post-discharge for persons infected with Alpha compared with non-VOC. |
| Zavascki, 2021 [38]  | June 2020 - May 2021            | Research Square              | We investigate the requirement of ventilatory support and mortality rates in non-elderly adult patients                                                                                                                                         | Hospital  | In the main cohort a total of 86 (43 Gamma and 43 non-Gamma)                                                             | The primary outcome was the incidence rate of need of advanced ventilatory support. Also                                   | Gamma              | Brazil  | In non-elderly hospitalized patients, COVID-19 caused by Gamma VOC may present a more severe                                                                                                                             |

| Author,<br>date | Date of<br>data<br>collectio<br>n                      | Source  | Objective                                                                                                                                                                                                      | Setting   | Sample size                                                                                                                                                                      | Outcome measures             | Variant | Country | Main finding                                                                                                                                                                                                |
|-----------------|--------------------------------------------------------|---------|----------------------------------------------------------------------------------------------------------------------------------------------------------------------------------------------------------------|-----------|----------------------------------------------------------------------------------------------------------------------------------------------------------------------------------|------------------------------|---------|---------|-------------------------------------------------------------------------------------------------------------------------------------------------------------------------------------------------------------|
|                 |                                                        |         | hospitalized due to COVID-19 caused by Gamma and non-Gamma SARS-CoV-2 lineages                                                                                                                                 |           | patients were included. The sensitivity cohort included 433 patients: 259 from the first and 174 from the second period (before and after the emergence of Gamma, respectively). | reported on 28-day mortality |         |         | clinical course, with increased need of advanced respiratory support and higher 28-day mortality.                                                                                                           |
| Zhao, 2021 [78] | Sep 1 <sup>st</sup> , 2020-Jan 31 <sup>st</sup> , 2021 | Viruses | To assess the risk of COVID-19 case fatality using the disease surveillance data to reconstruct the real-time and variant-specific CFR of COVID-19 and infer the change in fatality risk associated with Alpha | Community | 149,789 complete human SARS-CoV-2 strains from the GISAID                                                                                                                        | CRF                          | Alpha   | UK      | Overall CFR increased from 1% in September 2020 to 2.2% in November 2020 and stabilized at this level. The variant-specific change in CFR may increase by 18% of fatality risk compared with the wild-type. |

67 *CFR = case facility ratio; VOC = variants of concern; SGFT = S-gene target failure; ICU = intensive care unit; UK = United Kingdom; PCR = polymerase chain reaction; HCW = healthcare worker;*

68 *PPE = personal protective equipment; ARF = acute respiratory failure*

69
